# Supplementary material for: Electrochemical coupling halobenzene into biphenyl on a reusable Pd nanoparticle-coated carbon-paper electrode at ambient conditions
Source: Royal Society of Chemistry journal article supplement (doi:10.1039/d0nj06027e), 2021-01-01
Supplement: d0nj06027e1.pdf [file d0nj06027e1.pdf]

**Electronic Supplementary Material (ESI) for New Journal of Chemistry**

**Electrochemical coupling halobenzene into biphenyl on reusable  
Pd nanoparticles-coated carbon-paper electrode at ambient  
conditions**

Chao-Nan Wang<sup>†</sup>, Yong-Heng Lu<sup>†</sup>, Yue Liu, Jun Liu, Yao-Yue Yang\*, Zhi-Gang Zhao\*

*Key Laboratory of Basic Chemistry of State Ethnic Commission, School of Chemistry and Environment, Southwest Minzu University, Chengdu 610041, Sichuan, China.*

\*Corresponding author: YYY, *E-mail: yaoyueyoung@swun.edu.cn*; ORCID ID: 0000-0002-4573-9437; ZZG, *E-mail: zzg63129@163.com*

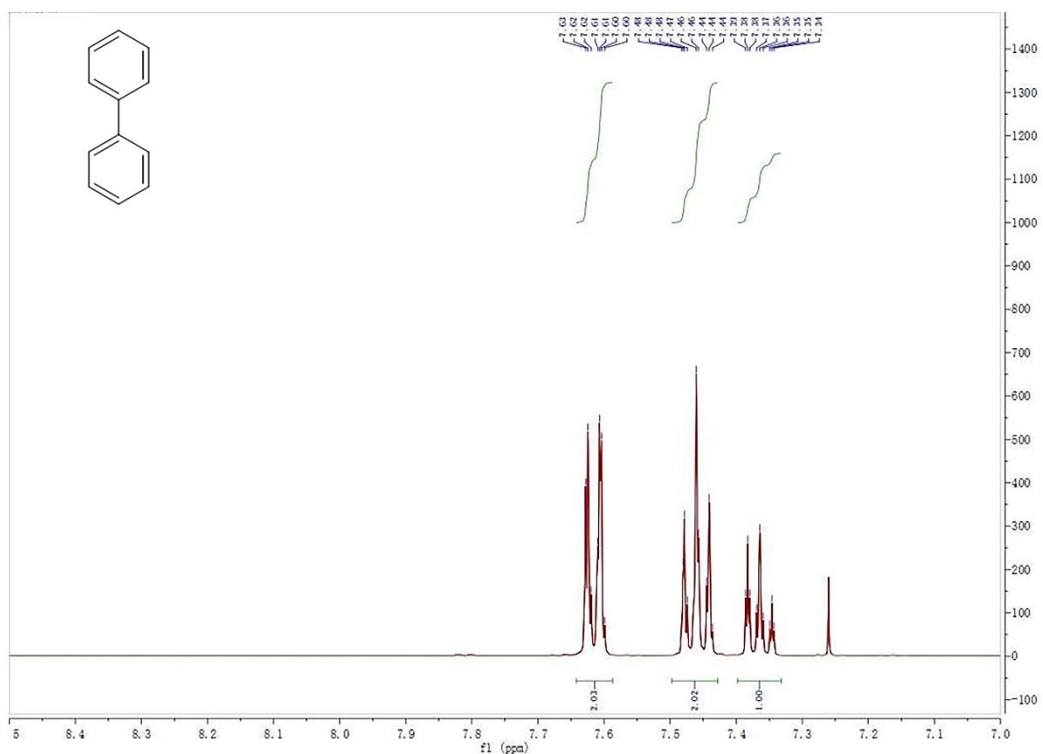

**Figure S1.** The typical  $^1\text{H}$  NMR spectra of the product obtained from the reaction conditions described in entry 1-2, table 2 in the manuscript.

**Biphenyl:**  $^1\text{H}$  NMR (400 MHz,  $\text{CDCl}_3$ ),  $\delta$ (ppm) 7.599-7.628 (m, 2H), 7.436-7.483 (m, 2H), 7.343-7.386 (m, 1H).

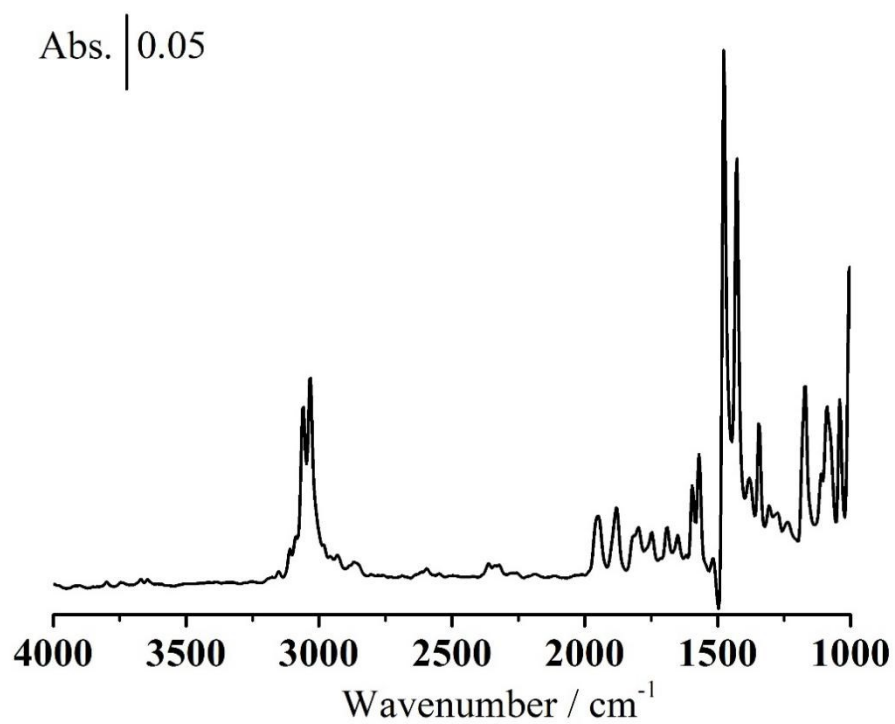

**Figure S2.** Infrared spectrum of the product obtained from the reaction conditions described in entry 1-2, table 2 in the manuscript.

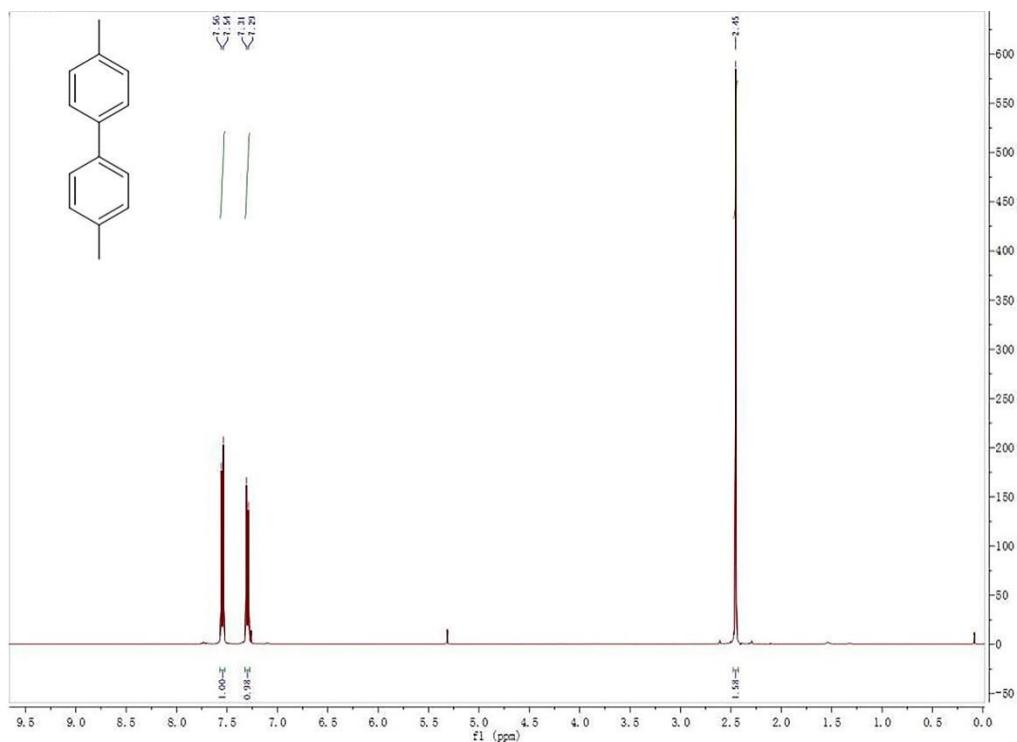

**Figure S3.** The typical <sup>1</sup>H NMR spectra of the product obtained from the reaction conditions described in entry 4-5, table 2 in the manuscript.

**4,4'-Dimethylbiphenyl:** <sup>1</sup>H NMR(400 MHz, CDCl<sub>3</sub>) δ (ppm) 7.55 (d, *J*=8 Hz, 1H), 7.30 (d, *J*=8 Hz, 1H), 2.453 (s, 1.5H).

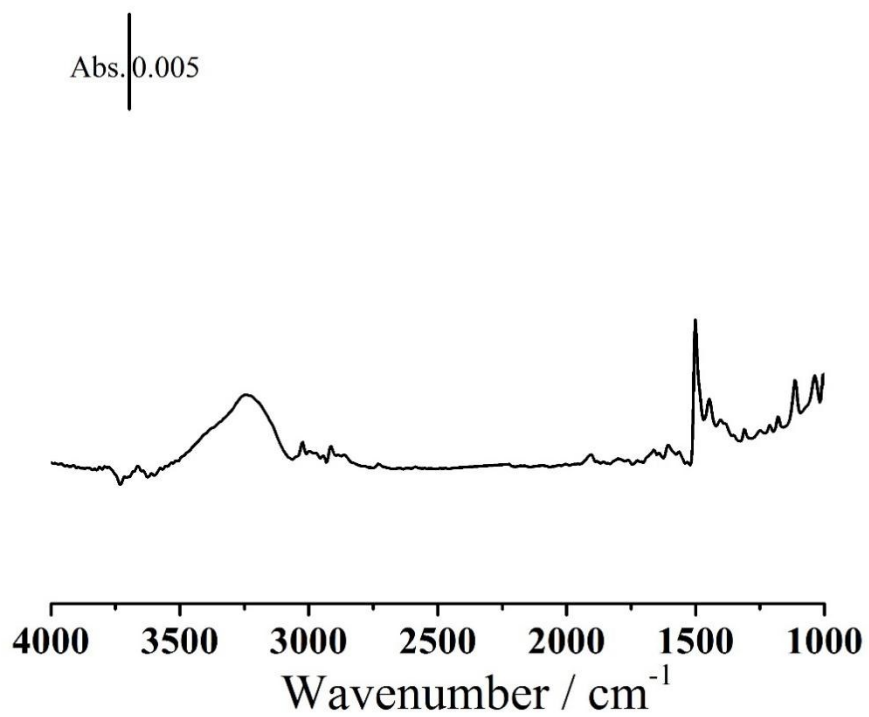

**Figure S4.** Infrared spectrum of the product obtained from the reaction conditions described in entry 4-5, table 2 in the manuscript.

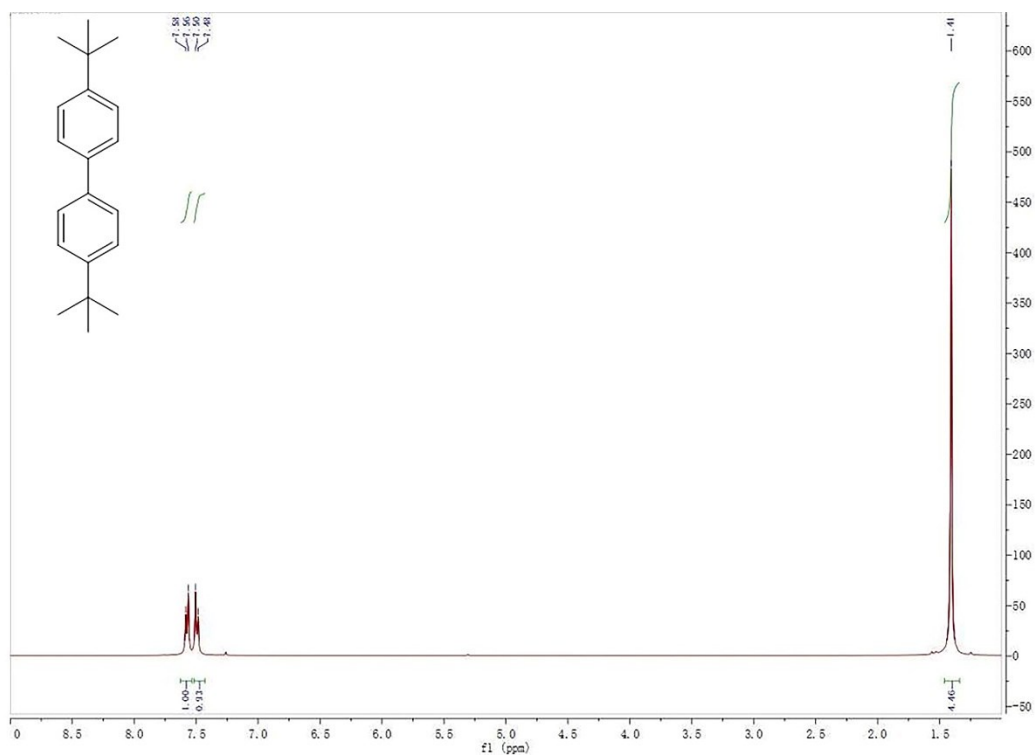

**Figure S5.** The typical <sup>1</sup>H NMR spectra of the product obtained from the reaction conditions described in entry 6-7, table 2 in the manuscript.

**4,4'-Di-tert-butyl-1,1'-biphenyl:** <sup>1</sup>H NMR(400 MHz, CDCl<sub>3</sub>) δ (ppm) 7.57 (d, *J*=8.4 Hz, 1H), 7.49 (d, *J*=8.4 Hz, 1H), 1.405 (s, 4.5H)

Abs. | 0.01

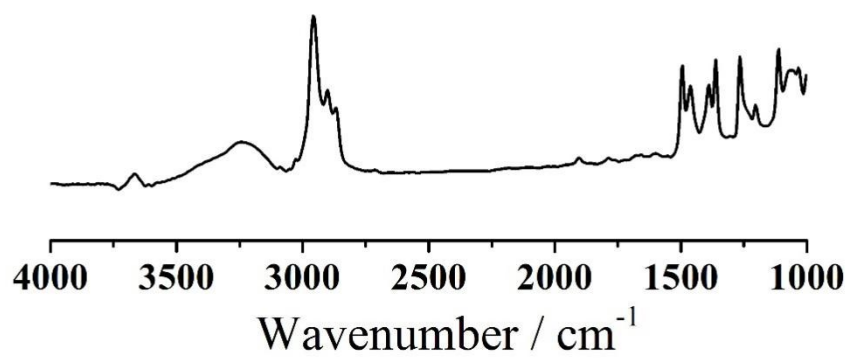

**Figure S6.** Infrared spectrum of the product obtained from the reaction conditions described in entry 6-7, table 2 in the manuscript.





Abs. | 0.01

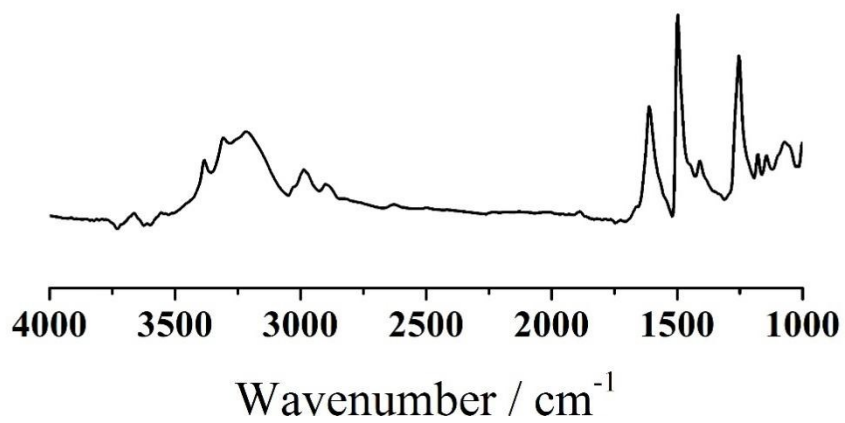

**Figure S8.** Infrared spectrum of the product obtained from the reaction conditions described in entry 10-11, table 2 in the manuscript.

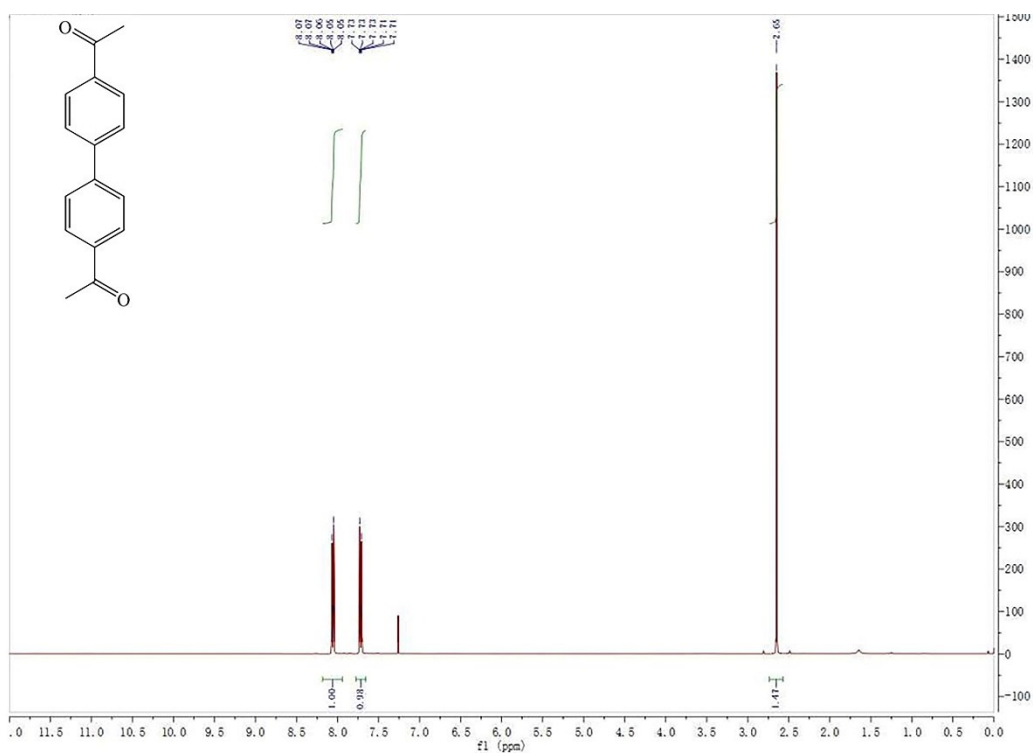

**Figure S9.** The <sup>1</sup>H NMR spectra of the product obtained from the reaction conditions described in entry 12-13, table 2 in the manuscript.

**4,4'-Diacetylbiphenyl:** <sup>1</sup>H NMR(400 MHz, CDCl<sub>3</sub>) δ (ppm) 8.05-8.07 (m, 1H)  
7.71-7.73 (m, 1H) 2.65 (s, 1.5H)

Abs. | 0.02

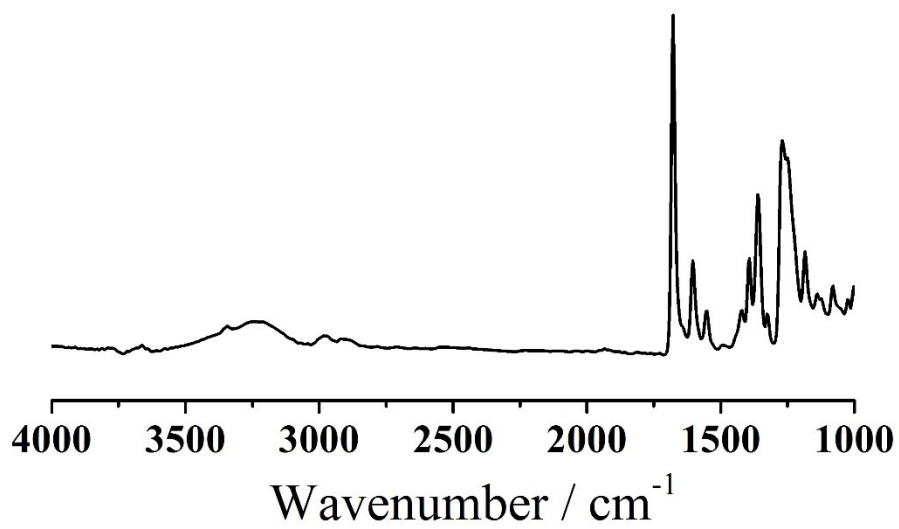

**Figure S10.** Infrared spectrum of the product obtained from the reaction conditions described in entry 12-13, table 2 in the manuscript.

**Table S1.** The result with additional dose of 2,6-di-tert-butyl-4-methylphenol (BHT, 1.0 equiv.) as the radical scavenger during the electrochemical coupling of PhI under the same reaction conditions described in entry 7, Table 1 in the manuscript.

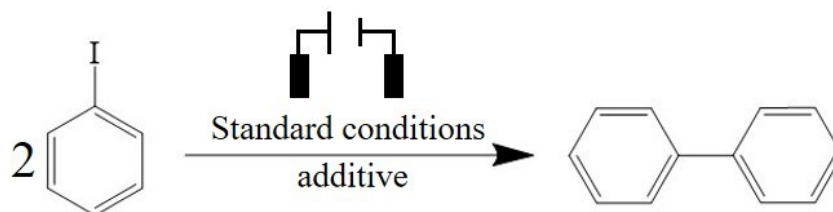

| additive        | Q                       | yield |
|-----------------|-------------------------|-------|
| BHT (1.0 equiv) | 3.9 F mol <sup>-1</sup> | 12 %  |

**Table S2.** Comparison of catalysis performance on palladium-based catalysts on biphenyl synthesis.

| Catalyst                                   | Solvent               | Base                           | T (°C)                | Time (h) | Yield (%) | Ref.             |
|--------------------------------------------|-----------------------|--------------------------------|-----------------------|----------|-----------|------------------|
| Pd–Au <sub>3</sub> /HT                     | IPA                   | KOH                            | 40                    | 2        | 97        | [1]              |
| Pd/CN-C                                    | EtOH                  | K <sub>2</sub> CO <sub>3</sub> | 30 (Ar)               | 5        | 94        | [2]              |
| Pd @CAP                                    | DMF                   | K <sub>2</sub> CO <sub>3</sub> | r.t.<br>(MW,400W)     | 6 mins   | 92        | [3]              |
| Pd/MOF-253                                 | DMSO/EtOH             | KOAc                           | 120 (N <sub>2</sub> ) | 10       | 99        | [4]              |
| FLA-Pd                                     | H <sub>2</sub> O      | K <sub>2</sub> CO <sub>3</sub> | reflux                | 1        | 93        | [5]              |
| Pd@Fe <sub>3</sub> O <sub>4</sub> -lignin  | EtOH/H <sub>2</sub> O | K <sub>2</sub> CO <sub>3</sub> | 90                    | 2.3      | 95        | [6]              |
| Pd/KB nanocomposite                        | EtOH/H <sub>2</sub> O | K <sub>2</sub> CO <sub>3</sub> | 90                    | 2.5      | 91        | [7]              |
| Mesh-GO/Pd                                 | EtOH/H <sub>2</sub> O | K <sub>2</sub> CO <sub>3</sub> | 90                    | 1.5      | 97        | [8]              |
| Pd@Fe <sub>3</sub> O <sub>4</sub> /CS-AG   | H <sub>2</sub> O      | K <sub>2</sub> CO <sub>3</sub> | r.t.<br>(MW,400W)     | 5 mins   | 96        | [9]              |
| Pd@Kao/Fe <sub>3</sub> O <sub>4</sub> /Pyr | —                     | K <sub>2</sub> CO <sub>3</sub> | r.t.<br>(MW,400W)     | 6 mins   | 95        | [10]             |
| <b>PdB/C</b>                               | <b>MeCN</b>           | <b>—</b>                       | <b>r.t.</b>           | <b>6</b> | <b>77</b> | <b>This Work</b> |

## References:

- [1] J. Wang, A. Xu, M. Jia, S. Bai, X. Cheng and B. Zhaorigetu, *New J. Chem.*, 2017, **41**, 1905-1908.
- [2] Q. Jia, S. Zhang and Q. Gu, *J. Energy Chem.*, 2019, **30**, 152-161.
- [3] T. Baran and M. Nasrollahzadeh, *Int. J. Biol. Macromol.*, 2020, **148**, 565-573.
- [4] L. Chen, Z. Gao and Y. Li, *Catal. Today*, 2015, **245**, 122-128.
- [5] M. Nasrollahzadeh, Z. Issaabadi and R.S. Varma, *ACS Omega*, 2019, **4**, 14234-14241.
- [6] M. Nasrollahzadeh, N.S.S. Bidgoli, Z. Issaabadi, Z. Ghavamifar, T. Baran and R. Luque, *Int. J. Biol. Macromol.*, 2020, **148**, 265-275.
- [7] B. Feizi Mohazzab, B. Jaleh, M. Nasrollahzadeh and Z. Issaabadi, *Catal. lett.*, 2018, **149**, 169-179.
- [8] B. Feizi Mohazzab, B. Jaleh, Z. Issaabadi, M. Nasrollahzadeh and R.S. Varma, *Green Chem.*, 2019, **21**, 3319-3327.
- [9] T. Baran and M. Nasrollahzadeh, *Carbohydr. Polym.*, 2019, **222**, 115029.
- [10] T. Baran and M. Nasrollahzadeh, *J. Phys. Chem. Solids*, 2020, **146**, 109566.
